# Supplementary material for: Low molecular weight poly((d,l)-lactide-co-caprolactone) liquid inks for diluent-free DLP printing of cell culture platforms
Source: Royal Society of Chemistry journal article supplement (doi:10.1039/d3bm00581j), 2023-01-01
Supplement: d3bm00581j1.pdf [file d3bm00581j1.pdf]

## Supporting information

### **Low molecular weight poly((d,l)-lactide-co-caprolactone) liquid resins for diluent-free DLP printing of cell culture platforms.**

Sandra Ramos-Díez<sup>\*a</sup>, Garazi Larrañaga-Jaurrieta<sup>\*a,b</sup>, Leire Iturriaga<sup>c</sup>, Ander Abarrategi<sup>b,d</sup> and Sandra Camarero-Espinosa<sup>a,d</sup>.

---

<sup>a</sup> *BioSmarTE Lab, POLYMAT, University of Basque Country UPV/EHU, Donostia/San Sebastián 20018, Gipuzkoa, Spain.*

<sup>b</sup> *Regenerative Medicine Lab, CICbiomaGUNE, Donostia/San Sebastián 20014, Gipuzkoa, Spain.*

<sup>c</sup> *CIPITRIA LAB-Bioengineering in Regeneration and Cancer, Biodonostia Health Research Institute, University of Basque Country UPV/EHU, Donostia/San Sebastián 20014, Gipuzkoa, Spain.*

<sup>d</sup> *IKERBASQUE, Basque Foundation for Science, Bilbao, Spain.*

Email: [sandra.camarero@polymat.eu](mailto:sandra.camarero@polymat.eu)

## **<sup>1</sup>H-NMR signal analysis of intermediate and methacrylated polymers**

<sup>1</sup>H NMR **2-arm-P(d,l)LA** (CDCl<sub>3</sub>, 500 MHz): δ (ppm) = 1.58 (d, CH<sub>3</sub> PLA, 48H), δ = 3.51 (q, CH PLA, 2H), δ (ppm) = 3.65 (t, CH<sub>2</sub> TEG, 4H), δ = 4.33 (t, CH<sub>2</sub> TEG, 8H), δ = 4.97 (q, CH PLA, 14H). <sup>1</sup>H NMR **2-arm-PCL** (CDCl<sub>3</sub>, 500 MHz): δ (ppm) = 1.25 (tt, CH<sub>2</sub> PCL, 48H), δ = 1.56 (tt, CH<sub>2</sub> PCL, 48H), δ = 1.66 (tt, CH<sub>2</sub> PCL, 48H), δ (ppm) = 2.23 (t, CH<sub>2</sub> PCL, 48H), δ = 3.64 (t, CH<sub>2</sub> PCL, 48H), δ (ppm) = 3.65 (t, CH<sub>2</sub> TEG, 4H), δ = 4.33 (t, CH<sub>2</sub> TEG, 8H). <sup>1</sup>H NMR **2-arm-P((d,l)LA-co-CL)** (CDCl<sub>3</sub>, 500 MHz): δ (ppm) = 1.25 (tt, CH<sub>2</sub> PCL, 36H), δ = 1.56 (tt, CH<sub>2</sub> PCL, 36H), δ (ppm) = 1.58 (d, CH<sub>3</sub> PLA, 36H), δ = 1.66 (tt, CH<sub>2</sub> PCL, 36H), δ (ppm) = 2.23 (t, CH<sub>2</sub> PCL, 36H), δ = 3.51 (q, CH PLA, 2H), δ = 3.64 (t, CH<sub>2</sub> PCL, 36H), δ (ppm) = 3.65 (t, CH<sub>2</sub> TEG, 4H), δ = 4.33 (t, CH<sub>2</sub> TEG, 8H), δ = 4.97 (q, CH PLA, 10H). <sup>1</sup>H NMR **3-arm-P(d,l)LA** (CDCl<sub>3</sub>, 500 MHz): δ (ppm) = 0.91 (t, CH<sub>3</sub> TMP, 3H), δ (ppm) = 1.58 (d, CH<sub>3</sub> PLA, 72H), δ = 3.51 (q, CH PLA, 3H), δ = 4.02 (s, CH<sub>2</sub> TMP, 6H), δ = 4.97 (q, CH PLA, 21H). <sup>1</sup>H NMR **3-arm-PCL** (CDCl<sub>3</sub>, 500 MHz): δ (ppm) = 0.91 (t, CH<sub>3</sub> TMP, 3H), δ (ppm) = 1.25 (tt, CH<sub>2</sub> PCL, 72H), δ = 1.56 (tt, CH<sub>2</sub> PCL, 72H), δ = 1.66 (tt, CH<sub>2</sub> PCL, 72H), δ (ppm) = 2.23 (t, CH<sub>2</sub> PCL, 72H), δ = 3.64 (t, CH<sub>2</sub> PCL, 72H), δ = 4.02 (s, CH<sub>2</sub> TMP, 6H). <sup>1</sup>H NMR **3-arm-P((d,l)LA-co-CL)** (CDCl<sub>3</sub>, 500 MHz): δ (ppm) = 0.91 (t, CH<sub>3</sub> TMP, 3H), δ (ppm) = 1.25 (tt, CH<sub>2</sub> PCL, 54H), δ = 1.56 (tt, CH<sub>2</sub> PCL, 54H), δ (ppm) = 1.58 (d, CH<sub>3</sub> PLA, 54H), δ = 1.66 (tt, CH<sub>2</sub> PCL, 54H), δ (ppm) = 2.23 (t, CH<sub>2</sub> PCL, 54H), δ = 3.51 (q, CH PLA, 2H), δ = 3.64 (t, CH<sub>2</sub> PCL, 54H), δ = 4.02 (s, CH<sub>2</sub> TMP, 6H), δ = 4.97 (q, CH PLA, 16H).

<sup>1</sup>H NMR **2-arm-P(d,l)LA-MA** (CDCl<sub>3</sub>, 500 MHz): δ (ppm) = 1.58 (d, CH<sub>3</sub> PLA, 48H), δ (ppm) = 1.99 (s, CH<sub>3</sub> MA, 6H), δ = 3.51 (q, CH PLA, 2H), δ (ppm) = 3.65 (t, CH<sub>2</sub> TEG, 4H), δ = 4.33 (t, CH<sub>2</sub> TEG, 8H), δ = 4.97 (q, CH PLA, 14H), δ = 5.58 (dd, CH<sub>trans</sub>=C MA, 2H), δ = 6.15 (dd, CH<sub>cis</sub>=C MA, 2H). <sup>1</sup>H NMR **2-arm-PCL-MA** (CDCl<sub>3</sub>, 500 MHz): δ (ppm) = 1.25 (tt, CH<sub>2</sub> PCL, 48H), δ = 1.56 (tt, CH<sub>2</sub> PCL, 48H), δ = 1.66 (tt, CH<sub>2</sub> PCL, 48H), δ (ppm) = 1.99 (s, CH<sub>3</sub> MA, 6H), δ (ppm) = 2.23 (t, CH<sub>2</sub> PCL, 48H), δ = 3.64 (t, CH<sub>2</sub> PCL, 48H), δ (ppm) = 3.65 (t, CH<sub>2</sub> TEG, 4H), δ = 4.33 (t, CH<sub>2</sub> TEG, 8H), δ = 5.58 (dd, CH<sub>trans</sub>=C MA, 2H), δ = 6.15 (dd, CH<sub>cis</sub>=C MA, 2H). <sup>1</sup>H NMR **2-arm-P((d,l)LA-co-CL)-MA** (CDCl<sub>3</sub>, 500 MHz): δ (ppm) = 1.25 (tt, CH<sub>2</sub> PCL, 36H), δ = 1.56 (tt, CH<sub>2</sub> PCL, 36H), δ (ppm) = 1.58 (d, CH<sub>3</sub> PLA, 36H), δ = 1.66 (tt, CH<sub>2</sub> PCL, 36H), δ (ppm) = 1.99 (s, CH<sub>3</sub> MA, 6H), δ (ppm) = 2.23 (t, CH<sub>2</sub> PCL, 36H), δ = 3.51 (q, CH PLA, 2H), δ = 3.64 (t, CH<sub>2</sub> PCL, 36H), δ (ppm) = 3.65 (t, CH<sub>2</sub> TEG, 4H), δ = 4.33 (t, CH<sub>2</sub> TEG, 8H), δ = 4.97 (q, CH PLA, 10H), δ = 5.58 (dd, CH<sub>trans</sub>=C MA, 2H), δ = 6.15 (dd, CH<sub>cis</sub>=C MA, 2H). <sup>1</sup>H NMR **3-arm-P(d,l)LA-MA** (CDCl<sub>3</sub>, 500 MHz): δ (ppm) = 0.91 (t, CH<sub>3</sub> TMP, 3H), δ (ppm) = 1.58 (d, CH<sub>3</sub> PLA, 72H), δ (ppm) = 1.99 (s, CH<sub>3</sub> MA, 9H), δ = 3.51 (q, CH PLA, 3H), δ = 4.02 (s, CH<sub>2</sub> TMP, 6H), δ = 4.97 (q, CH PLA, 21H), δ = 5.58 (dd, CH<sub>trans</sub>=C MA, 3H), δ = 6.15 (dd, CH<sub>cis</sub>=C MA, 3H). <sup>1</sup>H NMR **3-arm-PCL-MA** (CDCl<sub>3</sub>, 500 MHz): δ (ppm) = 0.91 (t, CH<sub>3</sub> TMP, 3H), δ (ppm) = 1.25 (tt, CH<sub>2</sub> PCL, 72H), δ = 1.56 (tt, CH<sub>2</sub> PCL, 72H), δ = 1.66 (tt, CH<sub>2</sub> PCL, 72H), δ (ppm) = 1.99 (s, CH<sub>3</sub> MA, 9H), δ (ppm) = 2.23 (t, CH<sub>2</sub> PCL, 72H), δ = 3.64 (t, CH<sub>2</sub> PCL, 72H), δ = 4.02 (s, CH<sub>2</sub> TMP, 6H), δ = 5.58 (dd, CH<sub>trans</sub>=C MA, 3H), δ = 6.15 (dd, CH<sub>cis</sub>=C MA, 3H). <sup>1</sup>H NMR **3-arm-P((d,l)LA-co-CL)-MA** (CDCl<sub>3</sub>, 500 MHz): δ (ppm) = 0.91 (t, CH<sub>3</sub> TMP, 3H), δ (ppm) = 1.25 (tt, CH<sub>2</sub> PCL, 54H), δ = 1.56 (tt, CH<sub>2</sub> PCL, 54H), δ (ppm) = 1.58 (d, CH<sub>3</sub> PLA, 54H), δ = 1.66 (tt, CH<sub>2</sub> PCL, 54H), δ (ppm) = 1.99 (s, CH<sub>3</sub> MA, 9H), δ (ppm) = 2.23 (t, CH<sub>2</sub> PCL, 54H), δ = 3.51 (q, CH PLA, 2H), δ = 3.64 (t, CH<sub>2</sub> PCL, 54H), δ = 4.02 (s, CH<sub>2</sub> TMP, 6H), δ = 4.97 (q, CH PLA, 16H), δ = 5.58 (dd, CH<sub>trans</sub>=C MA, 3H), δ = 6.15 (dd, CH<sub>cis</sub>=C MA, 3H).

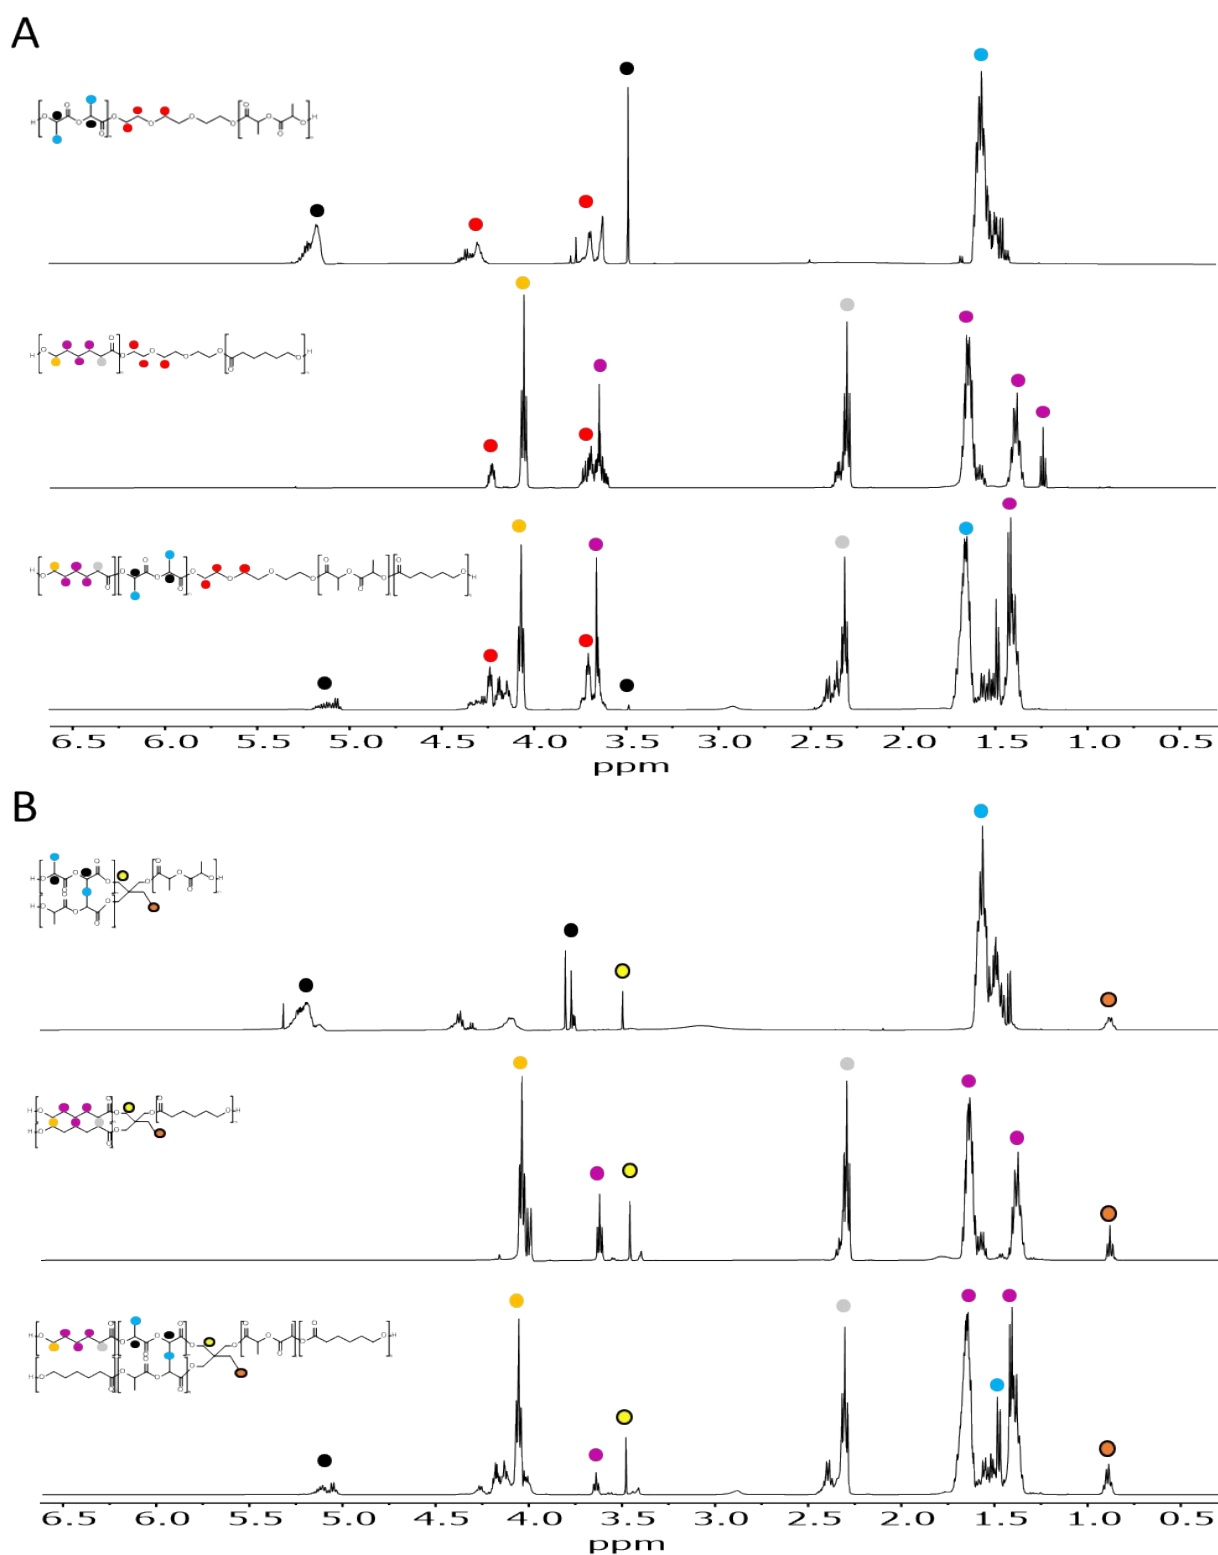

**Fig. S1**  $^1\text{H-NMR}$  spectrum analysis of 2- (A) and 3-arm (B) intermediate polymers in  $\text{CDCl}_3$ : (top) P(d,l)LA, (middle) PCL and (bottom) P(d,l)LA-co-CL. The specific proton signals are related to the molecule ones using colour dots.

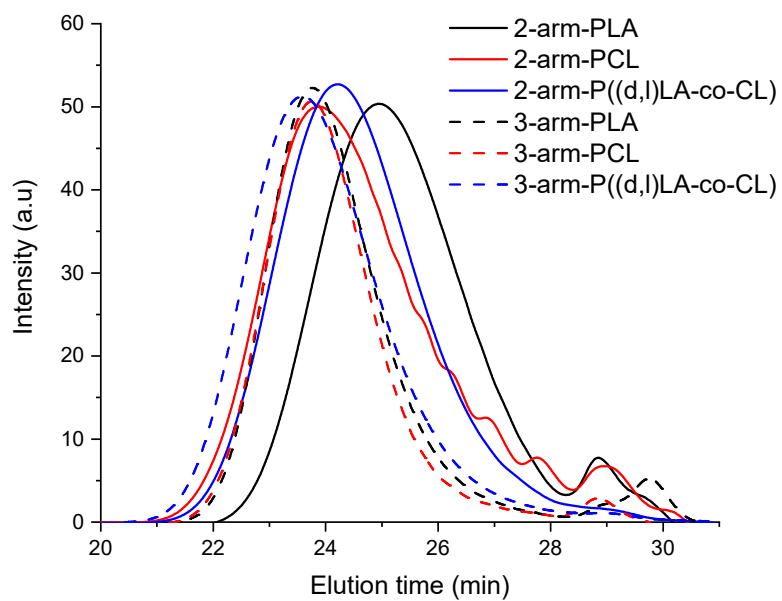

Fig. S2 GPC chromatogram of synthesized polymers.

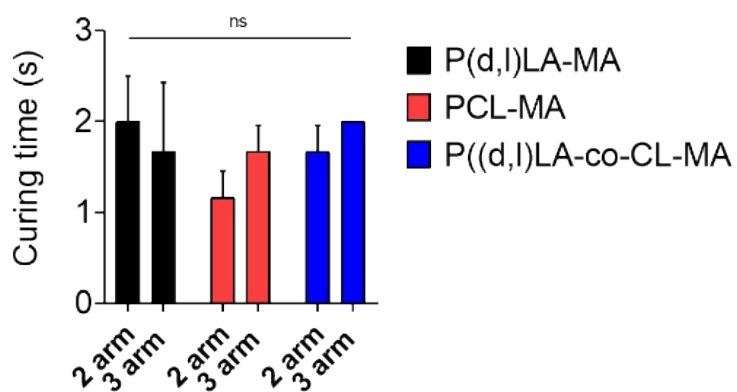

Fig. S3 Curing time of the methacrylated resins during photorheological experiments. Error bars denote standard deviation.

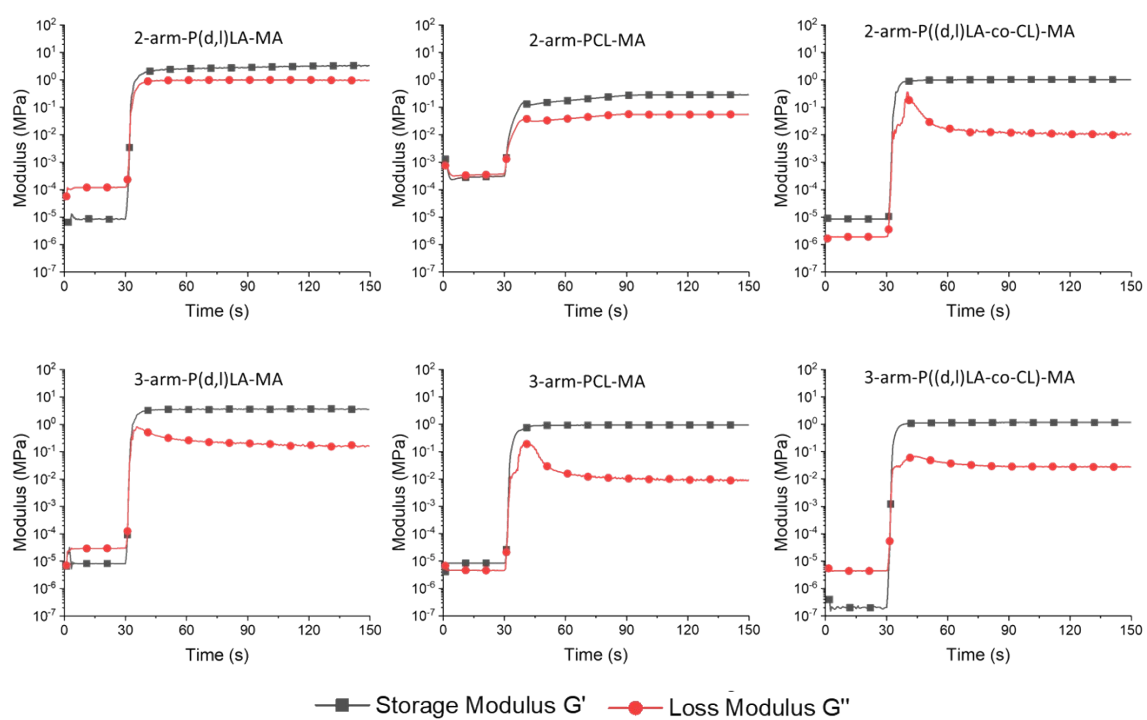

**Fig. S4** Storage and Loss moduli before and after UV exposure of 2-arm (top row) and 3-arm (bottom row) P((d,l)LA-co-CL)-MA (left), PCL-MA (middle) and P((d,l)-LA-MA (left).

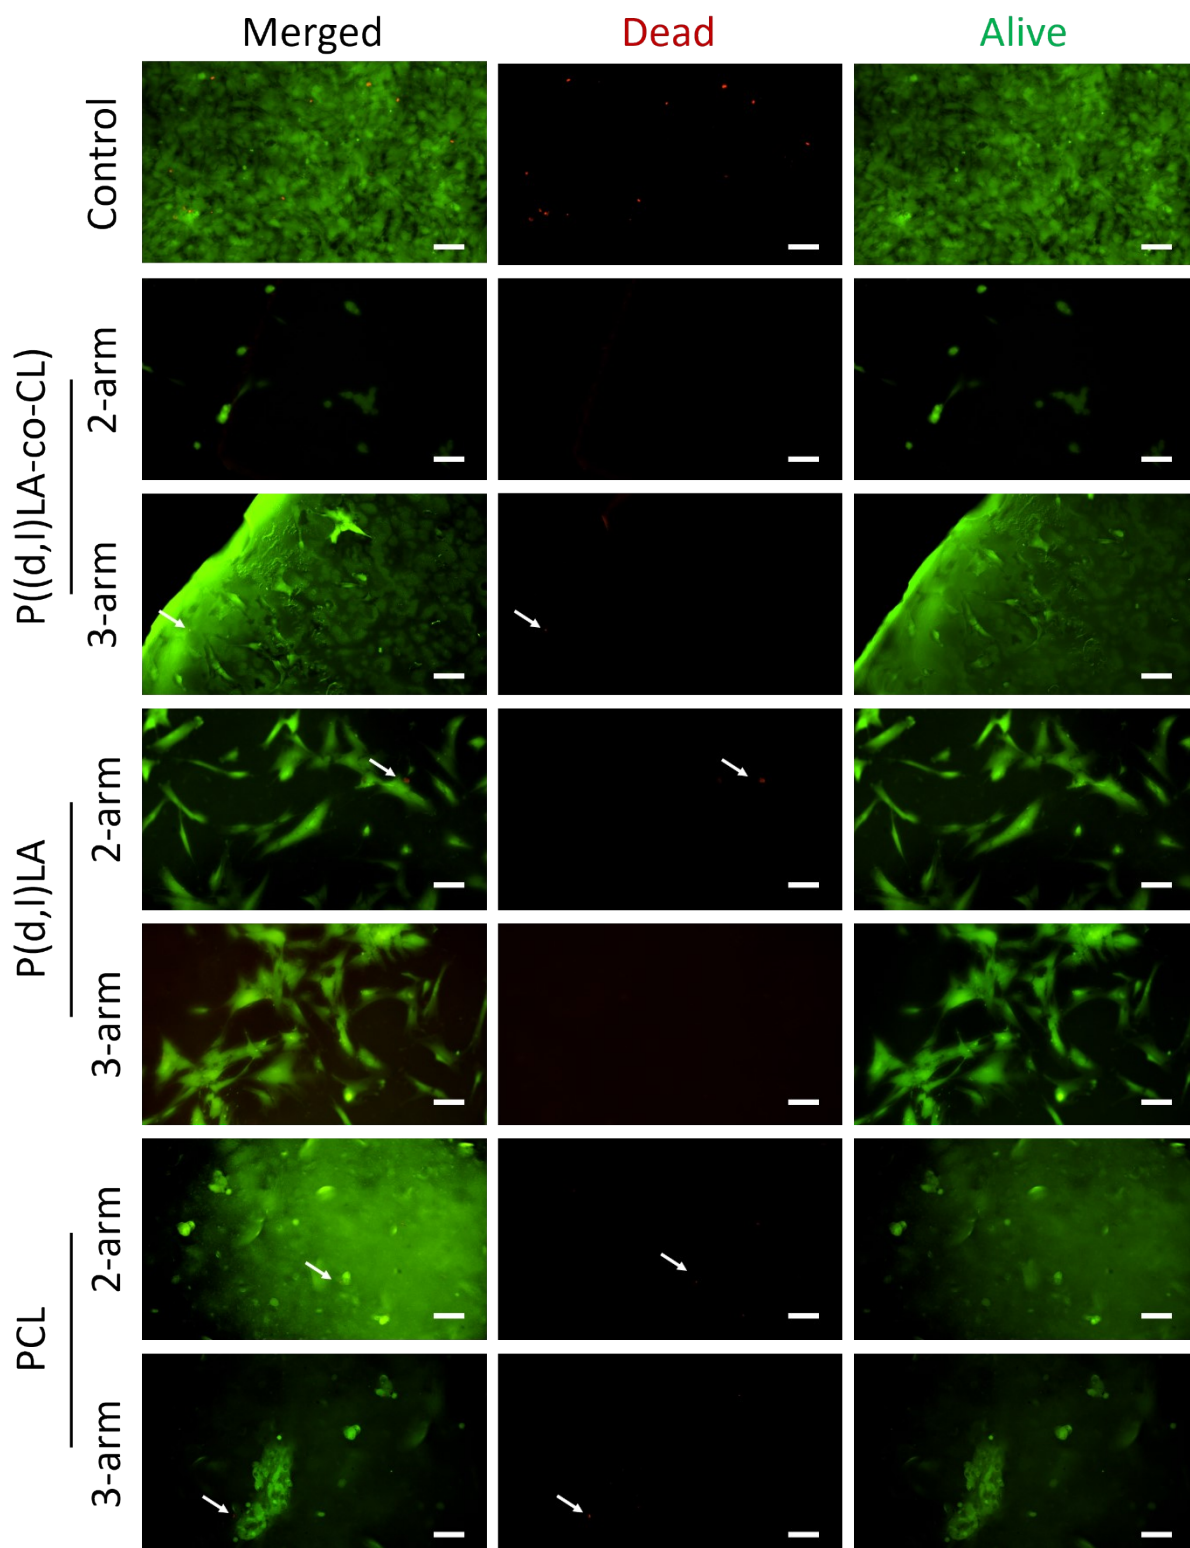

**Fig. S5** Split channels and merged images for the LIVE/DEAD assay of hMSCs after 24 hours seeded onto the films of the different (2- and 3-arms) homo- and copolymers. Dead cells are stained red (ethidium homodimer) and alive cells appear stained with calcein (green). Scale bars are 100  $\mu\text{m}$ .

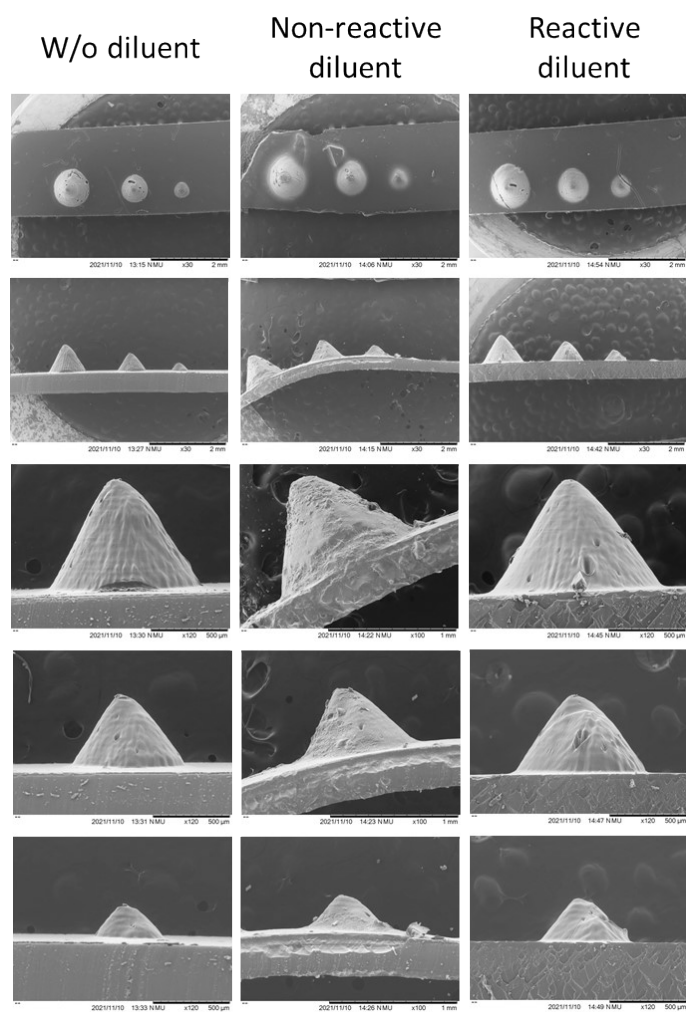

**Fig. S6** SEM images of the models with a gradient of cones in the surface using the copolymer P((d,l)LA-co-CL) of 2 arms without diluent (left), with non-reactive diluent (middle) and reactive diluent (right). Higher magnification of the cones with different sizes are shown from the bigger one to the smallest at the bottom.

**Table S1** **Micro-topography printing error of the gradients of cubes.** Average error in the diameter ( $\epsilon_\phi$ ) and the average error in height ( $\epsilon_h$ ). The theoretical dimensions of the 3 cones respectively was (Diameter x height): 1 mm x 1 mm, 0.75 mm x 0.75 mm and 0.5 mm x 0.5 mm.

| <b>2-arm-P((d,l)LA-co-CL)-MA</b>                          |                      |                    |                                |                            |
|-----------------------------------------------------------|----------------------|--------------------|--------------------------------|----------------------------|
|                                                           | <b>Cone position</b> | <b>W/o diluent</b> | <b>W/ non-reactive diluent</b> | <b>W/ reactive diluent</b> |
| <b><math>\epsilon_\phi</math> (%) <math>\pm</math> SD</b> | 1                    | $2 \pm 0.7$        | $10 \pm 2$                     | $3 \pm 2$                  |
|                                                           | 2                    | $5 \pm 0.7$        | $1 \pm 0.5$                    | $7 \pm 0.2$                |
|                                                           | 3                    | $19 \pm 7$         | $24 \pm 3$                     | $11 \pm 3$                 |
| <b><math>\epsilon_h</math> (%) <math>\pm</math> SD</b>    | 1                    | $35 \pm 0.4$       | $33 \pm 2$                     | $37 \pm 2$                 |
|                                                           | 2                    | $57 \pm 1$         | $39 \pm 2$                     | $42 \pm 2$                 |
|                                                           | 3                    | $126 \pm 3$        | $71 \pm 11$                    | $79 \pm 1$                 |
